# Supplementary material for: Co-Amorphization of Kanamycin with Amino Acids Improves Aerosolization
Source: PubMed Central journal article supplement (PMC7465208; doi:10.3390/pharmaceutics12080715), 2020-07-30
Supplement: pharmaceutics-12-00715-s001.pdf [file pharmaceutics-12-00715-s001.pdf]

# Supplementary Materials: Co-amorphization of Kanamycin with Amino acids Improves Aerosolization

Bishal Raj Adhikari, Kārlis Bērziņš, Sara J. Fraser-Miller, Keith C. Gordon and Shyamal C. Das

**Table S1** IR band positions (selected) in kanamycin-methionine co-amorphous system (KM), kanamycin-valine co-amorphous system (KV), kanamycin-phenylalanine co-amorphous system (KP), kanamycin-tryptophan co-amorphous system (KT), physical mixture of amorphous kanamycin and amorphous tryptophan (PM), amorphous kanamycin, amorphous tryptophan.

| KM [IR bands( $\text{cm}^{-1}$ )] | KV [IR bands( $\text{cm}^{-1}$ )] | KP [IR bands( $\text{cm}^{-1}$ )] | KT [IR bands( $\text{cm}^{-1}$ )] | PM [IR bands( $\text{cm}^{-1}$ )] | Amorphous Kanamycin [IR bands( $\text{cm}^{-1}$ )]                  | Amorphous Tryptophan [IR bands( $\text{cm}^{-1}$ )]                              |
|-----------------------------------|-----------------------------------|-----------------------------------|-----------------------------------|-----------------------------------|---------------------------------------------------------------------|----------------------------------------------------------------------------------|
|                                   |                                   |                                   | 427                               | 423                               |                                                                     | 424 (Benzene ring deformation vibration)                                         |
|                                   |                                   |                                   | 460                               | 457                               |                                                                     | 461 (Pyrrole ring deformation vibration)                                         |
| 609                               | 609                               | 609                               | 608                               | 608                               | 608 (Sulfate ion bending)                                           |                                                                                  |
|                                   |                                   |                                   | 749                               | 742                               |                                                                     | 740 (Benzene/ pyrrole ring deformation vibration)                                |
| 1031                              | 1030                              | 1031                              | 1033                              | 1032                              | 1029 (Sulfate ion stretching)                                       |                                                                                  |
| 1338                              | 1332                              | 1336                              | 1342                              | 1340                              | 1337 (C-H bending)                                                  | 1339 (C-H bending)                                                               |
|                                   |                                   |                                   | 1402                              | 1397                              |                                                                     | 1396 (-COOH sym. stretching)                                                     |
| 1521                              | 1520                              | 1521                              | 1522                              | 1519                              | 1528 (-NH <sub>2</sub> /NH <sub>3</sub> <sup>+</sup> sym. bending)  | 1490 (-NH <sub>2</sub> sym. bending)                                             |
| 1602                              | 1600                              | 1602                              | 1602                              | 1607                              | 1605 (-NH <sub>2</sub> /NH <sub>3</sub> <sup>+</sup> asym. bending) | 1601 (-COOH asym. stretch/ -NH <sub>2</sub> asym. bend/ Benzene ring stretching) |

**Table S2** Summary of the particles size analysis of the formulations. Values are expressed as mean  $\pm$  standard deviation.

| Formulation                  | SEM ( $\mu\text{m}$ ) (n=300) |
|------------------------------|-------------------------------|
| Kanamycin Only (KO)          | 1.1 $\pm$ 0.5                 |
| Kanamycin-valine (KV)        | 1.1 $\pm$ 0.5                 |
| Kanamycin-methionine (KM)    | 1.0 $\pm$ 0.5                 |
| Kanamycin-phenylalanine (KP) | 1.2 $\pm$ 0.5                 |
| Kanamycin-tryptophan (KT)    | 1.1 $\pm$ 0.6                 |

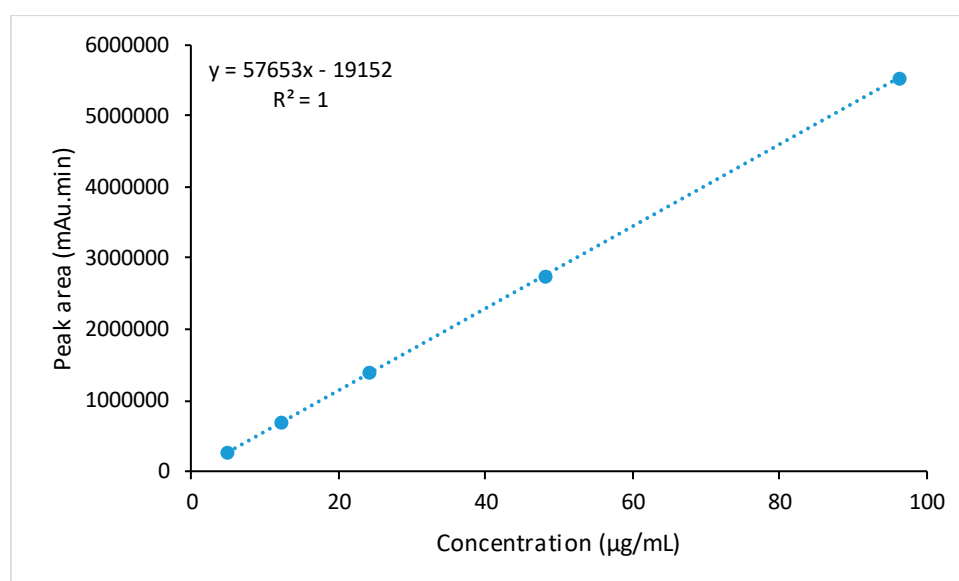

**Figure S1** Representative standard curve of concentration of kanamycin ( $R^2=0.99692$ ).

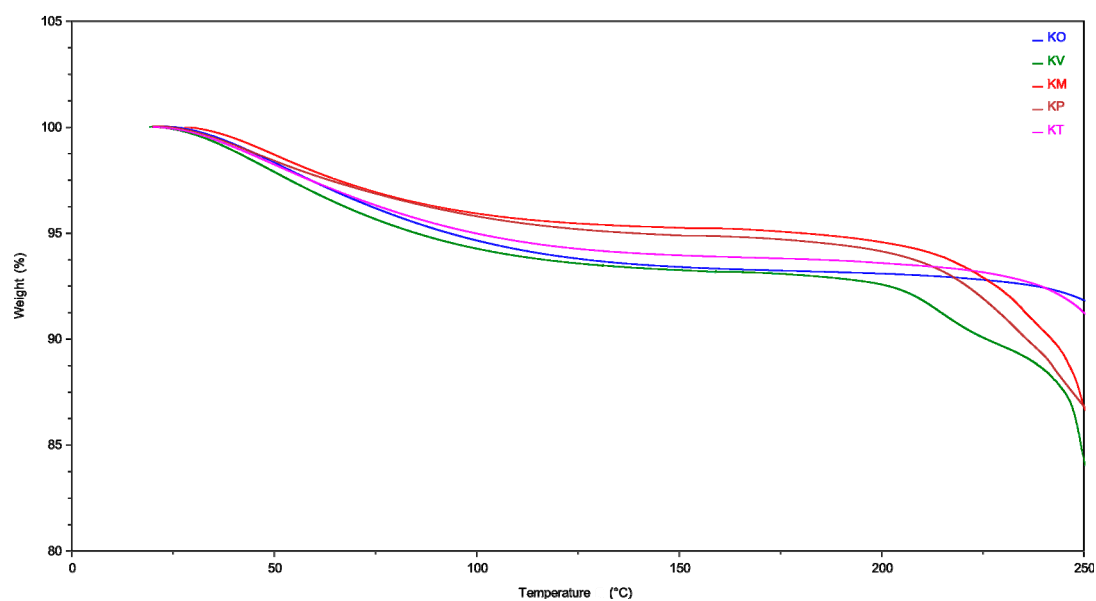

**Figure S2** Representative TGA thermograms of the formulations [kanamycin only (KO), kanamycin-valine (KV), kanamycin-methionine (KM), kanamycin-phenylalanine (KP), and kanamycin-tryptophan (KT)].

(a)

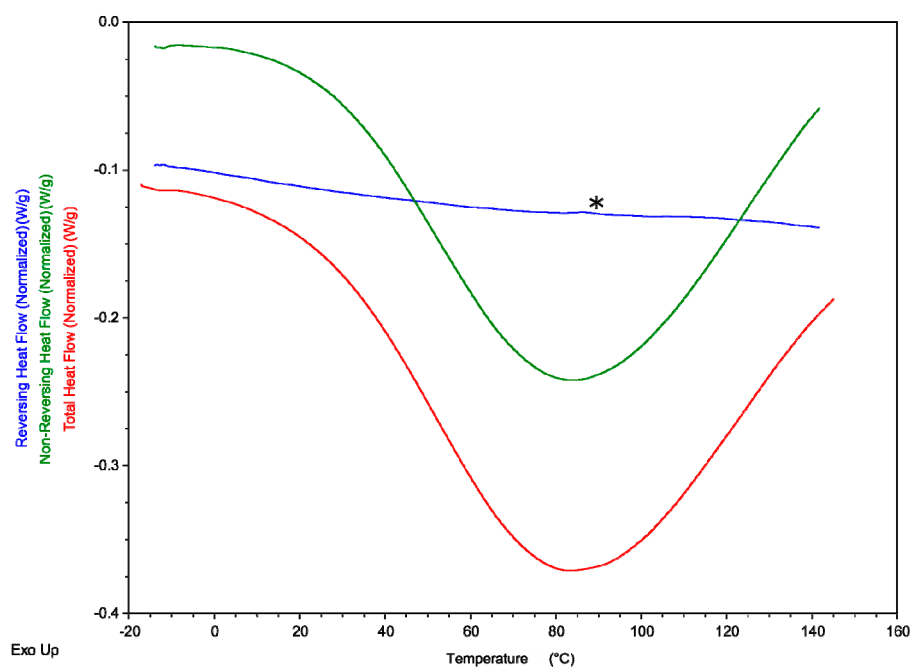

(b)

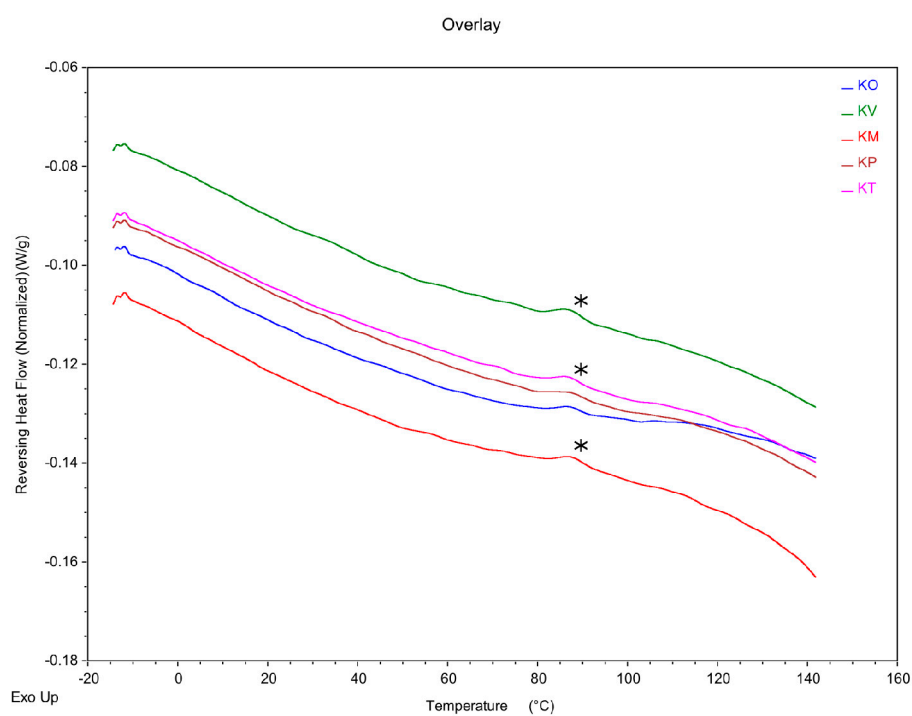

**Figure S3** DSC thermograms. (a) Representative DSC thermogram of kanamycin only spray-dried particles. (b) Representative MDSC thermograms (reversing heat flow only) of the formulations [kanamycin only (KO), kanamycin-valine (KV), kanamycin-methionine (KM), kanamycin-phenylalanine (KP), and kanamycin-tryptophan (KT)]. [Asterisk (\*) shows the step change associated with glass transition temperature.]

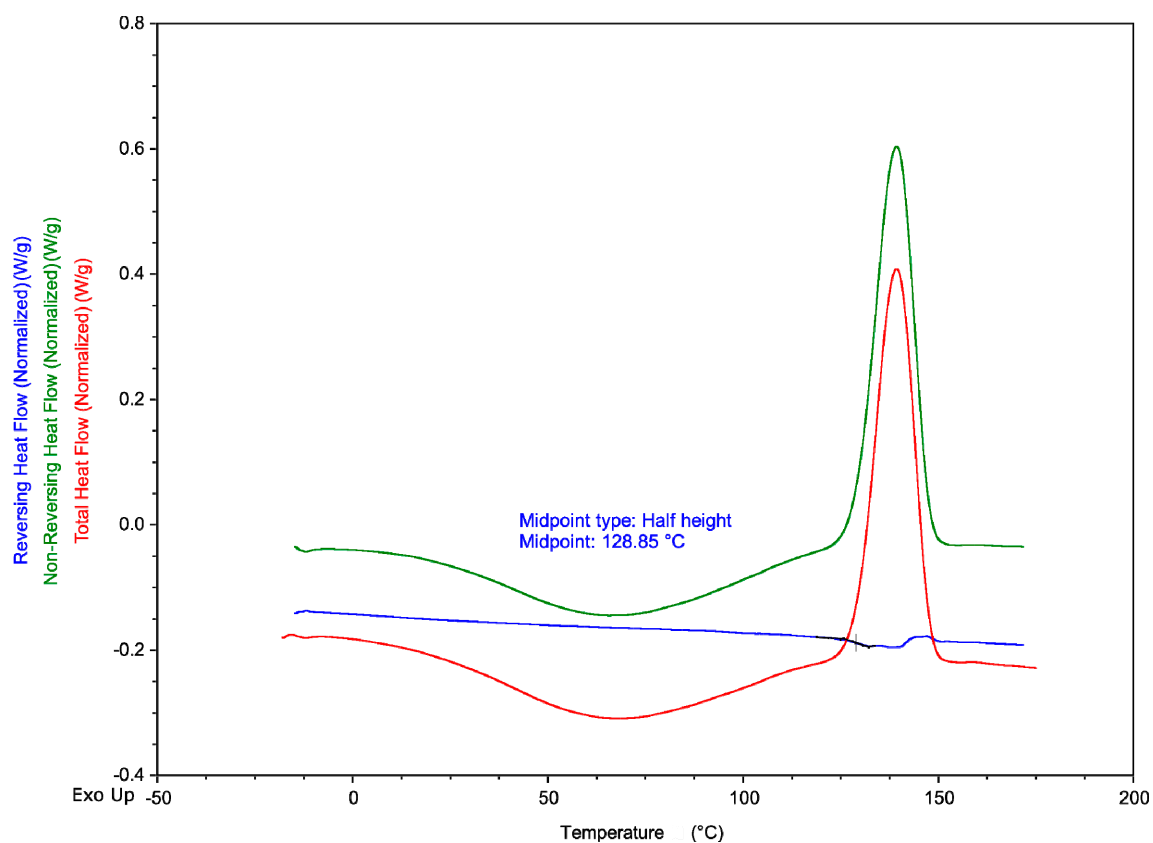

Figure S4 Representative MDSC thermogram of spray-dried tryptophan.

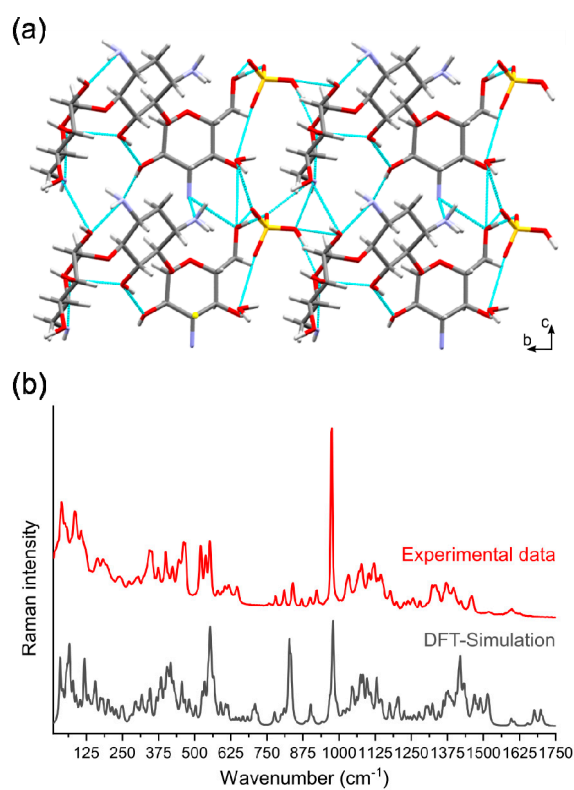

Figure S5 (a) View of the kanamycin sulfate monohydrate packing and different hydrogen-bonding patterns along the crystallographic *a*-axis. (b) Experimental and DFT-simulated Raman spectra of crystalline kanamycin sulfate (monohydrate).

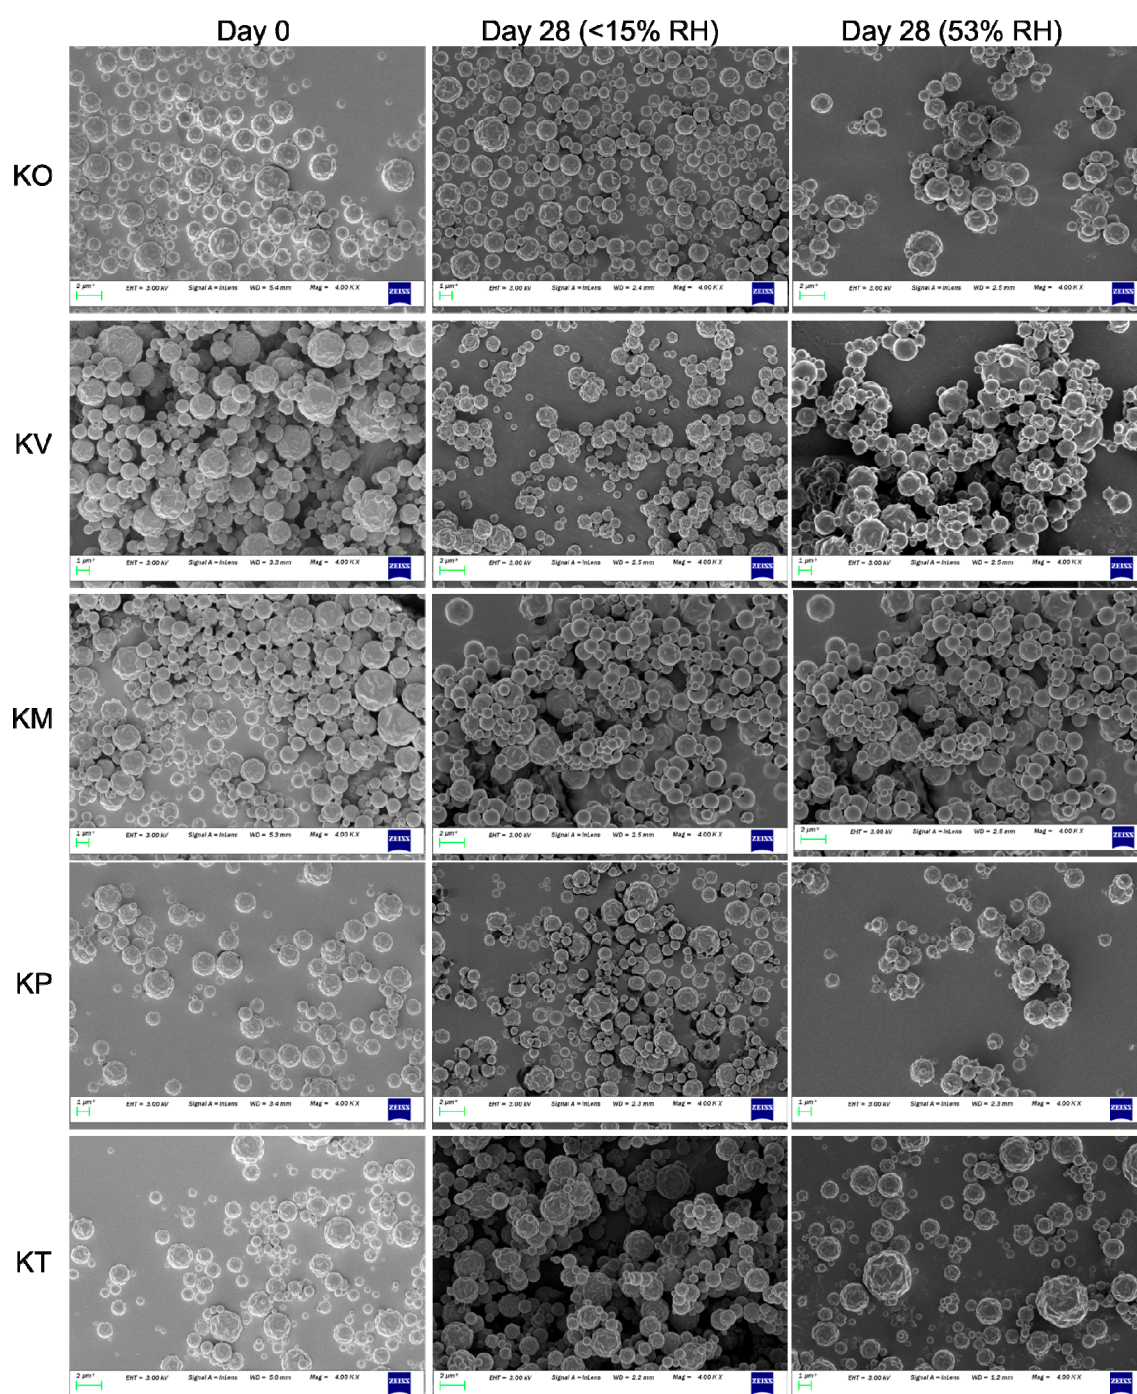

**Figure S6** Representative SEM images (low magnification) of the formulations [kanamycin only (KO), kanamycin-valine (KV), kanamycin-methionine (KM), kanamycin-phenylalanine (KP), and kanamycin-tryptophan (KT)] during the stability study on day 0 and day 28 when stored at 25 °C/<15 % RH and 25 °C/53 % RH.

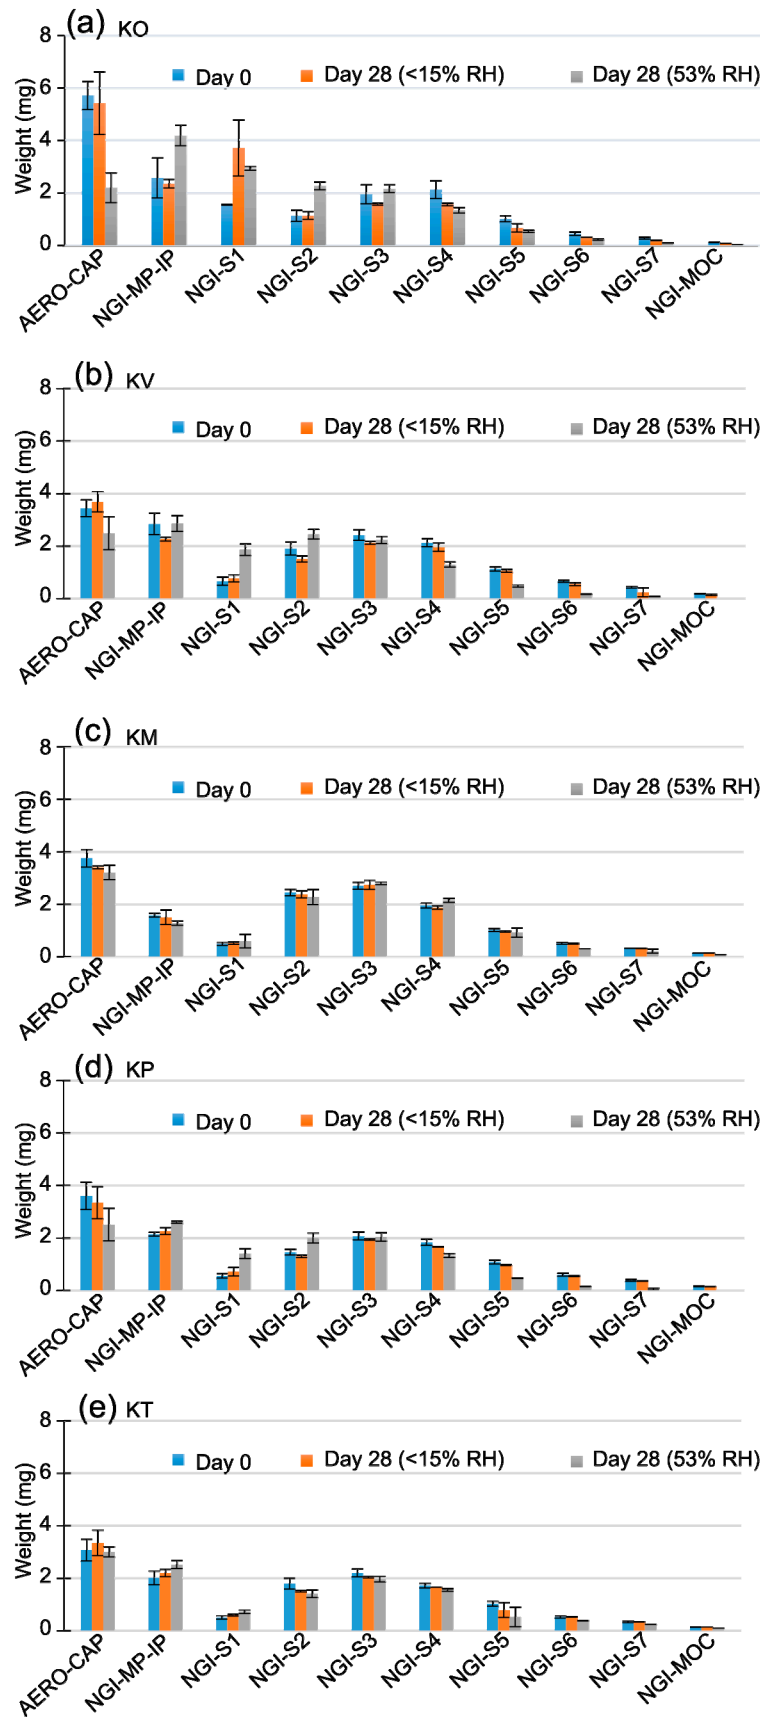

**Figure S7** Drug deposition behavior of the spray-dried particles over 28 days when stored at different stressed conditions (25 °C/<15% RH and 25 °C/ 53% RH) for (a) kanamycin only (KO), (b) kanamycin-valine (KV), (c) kanamycin-methionine (KM), (d) kanamycin-phenylalanine (KP), and (e) kanamycin-tryptophan (KT) formulations.

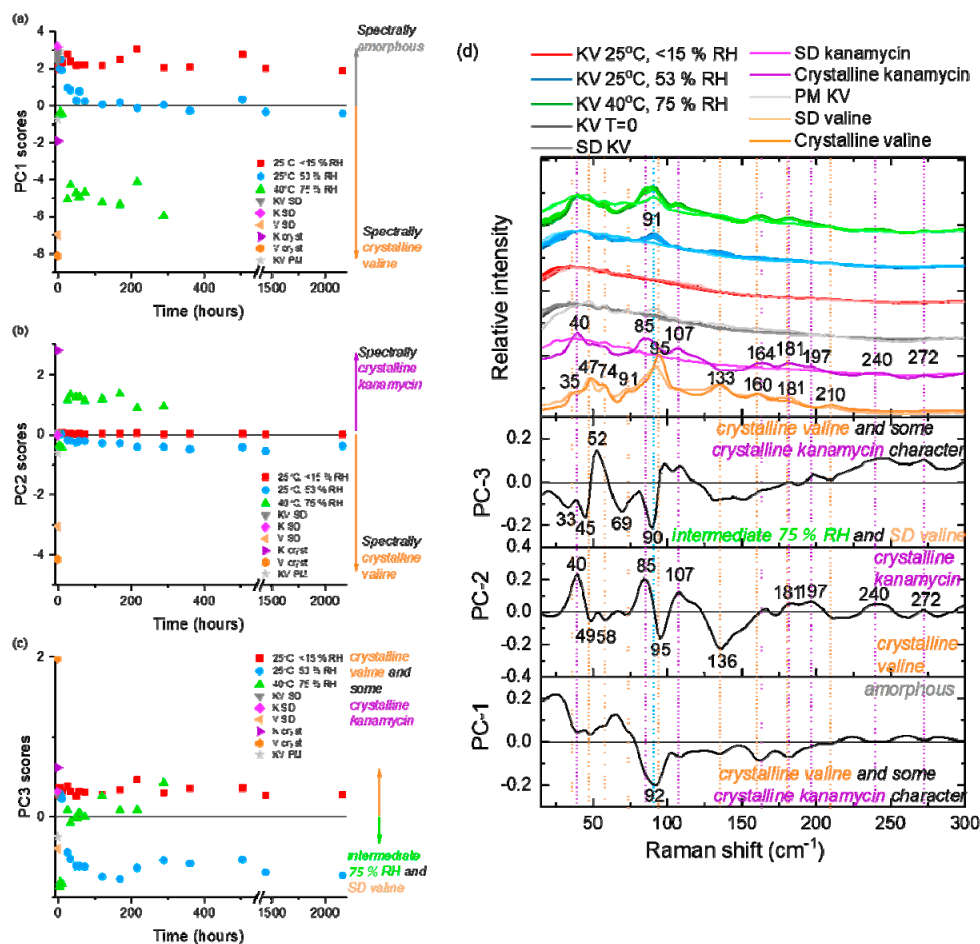

**Figure S8** Principal component analysis of the LFR spectra collected from KV samples stored under three different conditions (25 °C/<15% RH, 25 °C/53% RH and 40 °C/75% RH) over time. (a) PC 1 scores versus time, (b) PC 2 scores versus time, (c) PC3 scores versus time and (d) loadings with comparative spectra. PC 1 accounts for 86% of the explained spectral variance, PC 2 accounts for a further 9% and PC 3 a further 3% explained variance. PM represents physical mixture of amorphous kanamycin and crystalline valine in 1:1 molar ratio. Spectra from the different storage conditions in (c) have slight color graduations to highlight early (lighter coloring) versus latter (darker coloring) time points.

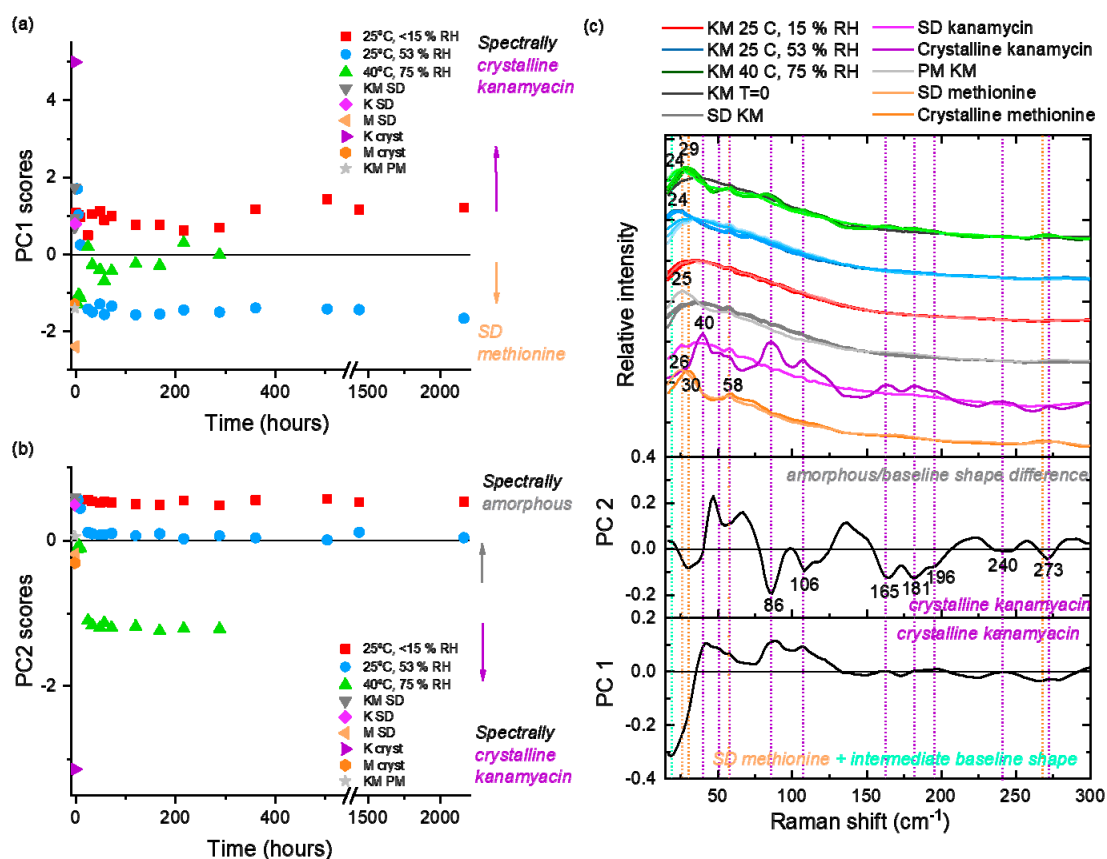

**Figure S9** Principal component analysis of the LFR spectra collected from KM samples stored under three different conditions (25 °C/<15% RH, 25 °C/53% RH and 40 °C/75% RH) over time. (a) PC 1 scores versus time, (b) PC 2 scores versus time, and (c) loadings with comparative spectra. PC 1 accounts for 67% of the explained spectral variance, PC 2 accounts for a further 21% explained variance. PM represents physical mixture of amorphous kanamycin and crystalline methionine in 1:1 molar ratio. Spectra from the different storage conditions in (c) have slight color graduations to highlight early (lighter coloring) versus latter (darker coloring) time points.

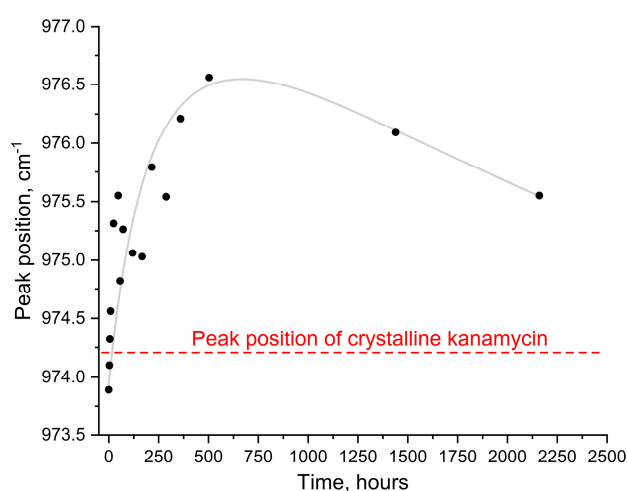

**Figure S10** Wavenumber position changes of the highest intensity peak for spray-dried kanamycin only (KO) formulation kept at 25 °C/53% RH. The line is drawn to assist in visualizing the trend.



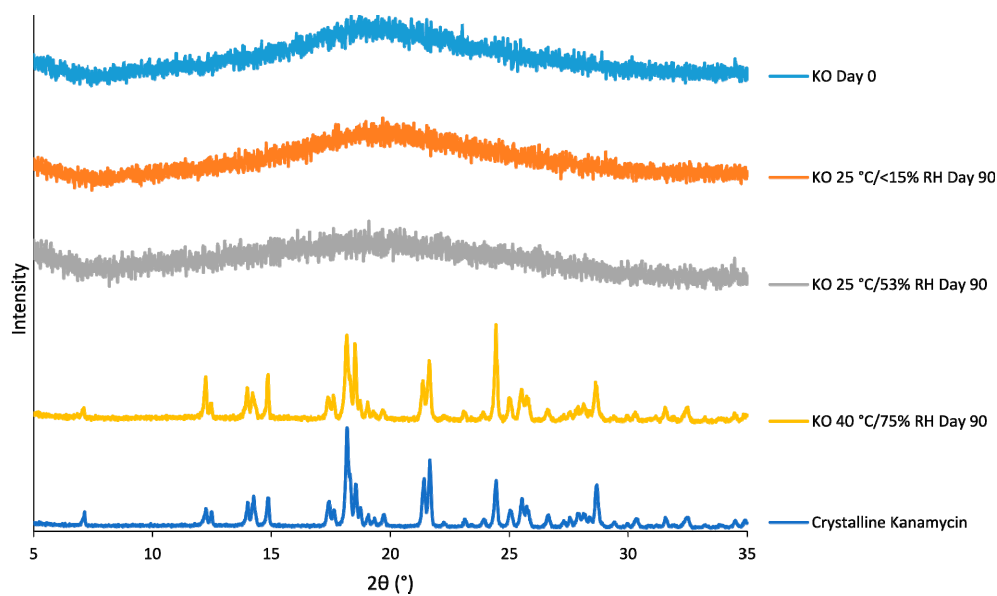

**Figure S11** Stability Study: PXRD of the kanamycin only formulation (KO) on day 0 and day 90 when kept at 25 °C/<15% RH, 25 °C/53% RH, and 40 °C/75% RH.

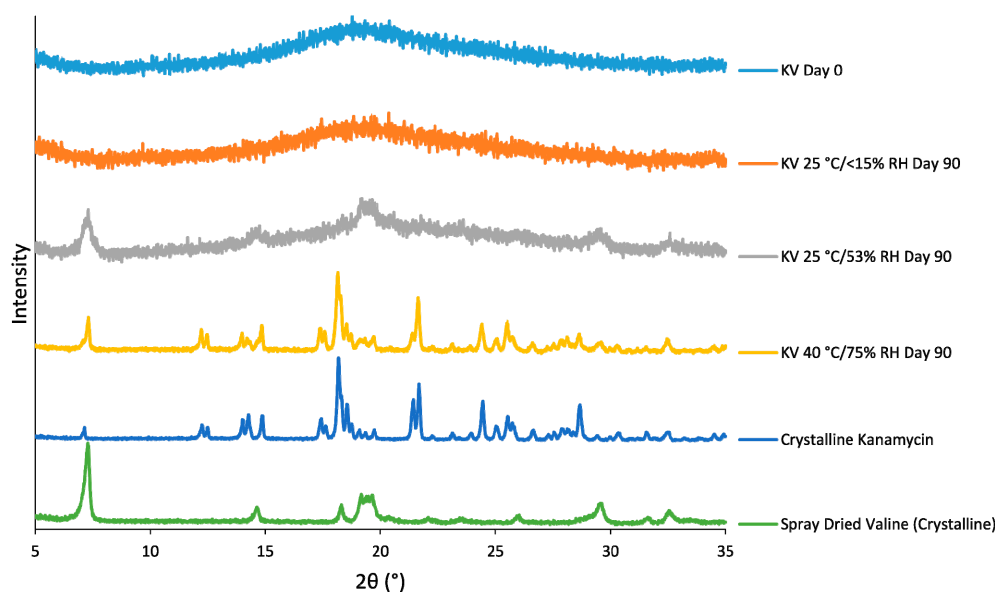

**Figure S12** Stability Study: PXRD of the kanamycin-valine formulation (KV) on day 0 and day 90 when kept at 25 °C/<15% RH, 25 °C/53% RH, and 40 °C/75% RH.

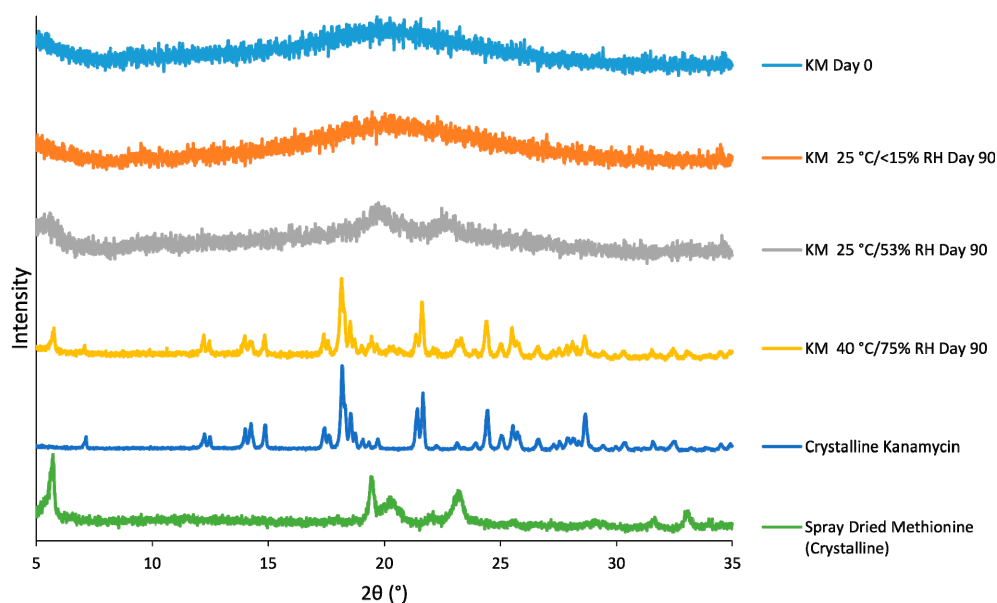

**Figure S13** Stability Study: PXRD of the kanamycin-methionine formulation (KM) on day 0 and day 90 when kept at 25 °C/<15% RH, 25 °C/53% RH, and 40 °C/75% RH.

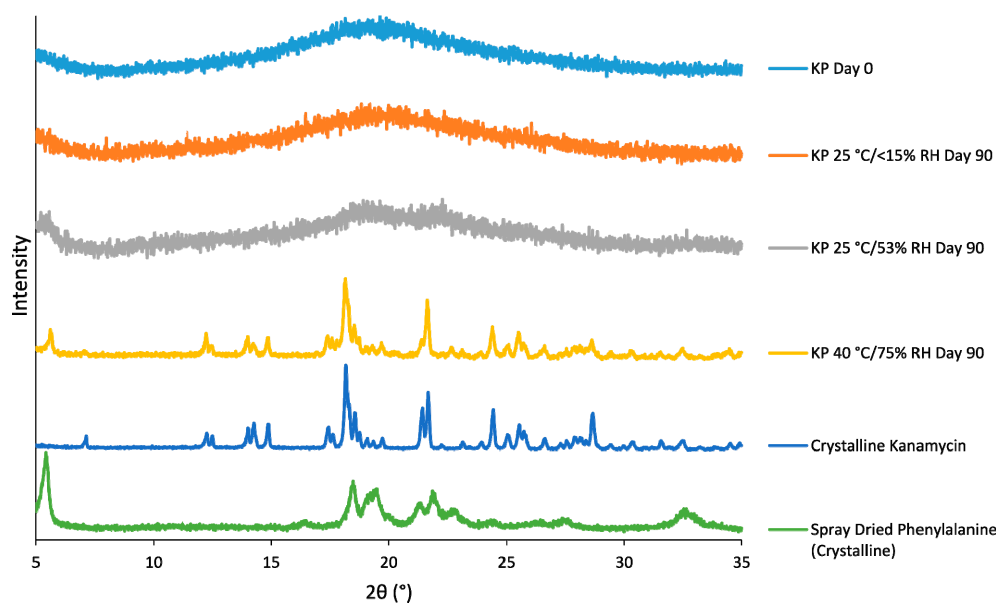

**Figure S14** Stability Study: PXRD of the kanamycin-phenylalanine formulation (KP) on day 0 and day 90 when kept at 25 °C/<15% RH, 25 °C/53% RH, and 40 °C/75% RH.

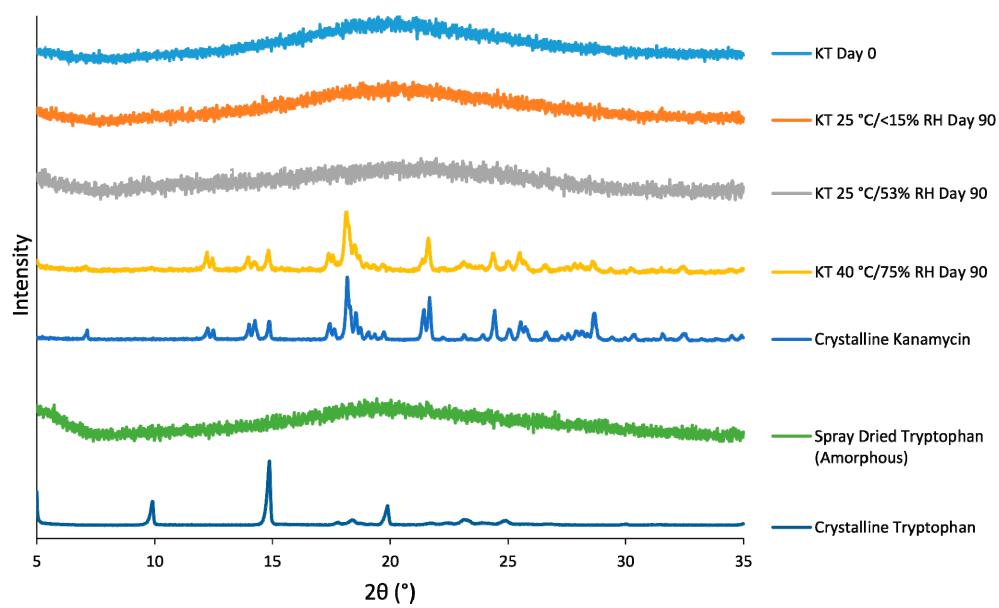

**Figure S15** Stability Study: PXRD of the kanamycin-tryptophan formulation (KT) on day 0 and day 90 when kept at 25 °C/<15% RH, 25 °C/53% RH, and 40 °C/75% RH.
